# Supplementary material for: A novel delivery vehicle for copper peptides
Source: Royal Society of Chemistry journal article supplement (doi:10.1039/d2nj04282g), 2022-11-24
Supplement: d2nj04282g1.pdf [file d2nj04282g1.pdf]

## A novel delivery vehicle for copper peptides

Tianqi Liu<sup>lab</sup>, LuHu<sup>ld</sup>, Beibei Lu<sup>c</sup>, Yi yang Bo<sup>c</sup>, YaLiao<sup>c</sup>, Jingbo Zhan<sup>c</sup>, Yunlin Pei<sup>d</sup>,  
Huaiqing Sun<sup>d</sup>, Zhenyuan Wang<sup>c</sup>, Chao wan Guo<sup>\*d</sup>, Jiaheng Zhang<sup>\*abc</sup>

<sup>a</sup>State Key Laboratory of Advanced Welding and Joining, School of Materials Science and Engineering, Harbin Institute of Technology (Shenzhen), Shenzhen 518055, P. R. China

<sup>b</sup>Research Centre of Printed Flexible Electronics, School of Materials Science and Engineering, Harbin Institute of Technology, Shenzhen 518055, P. R. China

<sup>c</sup>Shenzhen Shinesky Biological Technology Co. Ltd., Shenzhen, China

<sup>d</sup>Guangdong Marubi Biotechnol Co Ltd, Guangzhou 510700

**Email:** zhangjiaheng@hit.edu.cn (Jiaheng Zhang)

**Email:** zhangjiaheng@hit.edu.cn (Jiaheng Zhang)

**Materials.**

Betaine ,DL-Mal and Tar acids were from Sigma-Aldrich (St. Louis, MO, USA); Dulbecco's modified Eagle's medium (DMEM) from Gibco (Grand Island, USA); Fluorescein isothiocyanate labeled GHK-cu from Shanghai Apeptide Co.,Ltd.(Shanghai, China); SA- $\beta$ -Gal and Annexin V-FITC apoptosis detection kit from Beyotime Biotechnology(Shanghai, China).

**Characterizations.**

Spectroscopy and Fourier-transform infrared (FTIR; Thermo Scientific Nicolet iS 50, USA) spectroscopy operated in attenuated total reflection mode. The chemical structures of ILs dispersed in D<sub>2</sub>O were characterized using proton nuclear magnetic resonance (<sup>1</sup>H NMR; Bruker Avance III 400, USA). The size distribution and zeta potential of ILs were evaluated using the Zetasizer Nano ZS (Malvern, UK). Thermogravimetric analysis (TGA) was performed in an N<sub>2</sub> atmosphere at temperature increments of 10 °C min<sup>-1</sup> using a thermal analyzer (Netzsch STA 449F3, Germany). Differential scanning calorimetry (DSC) (Mettler Toledo DSC-3, Switzerland) measurements were conducted using N<sub>2</sub> and the system was cooled using liquid nitrogen on a thermal analyzer at temperature increments of 10 °C min<sup>-1</sup>. The absorbance of samples was recorded using ultraviolet-visible (UV-Vis) spectroscopy (PerkinElmer, Lambda 365, USA). The morphology of ILs was observed by transmission electron microscopy (TEM, 120 kV , FEI Tecnai G2 T12, Netherlands) and scanning electron microscopy (SEM, 5 kV , Hitachi SU8010, Japan). High-performance liquid chromatography (HPLC) measurements were conducted using the Agilent 1100 equipped with a quaternary pump, a diode array detector (DAD), an autosampler, and a thermostatted column compartment (Agilent, Santa Clara, USA).

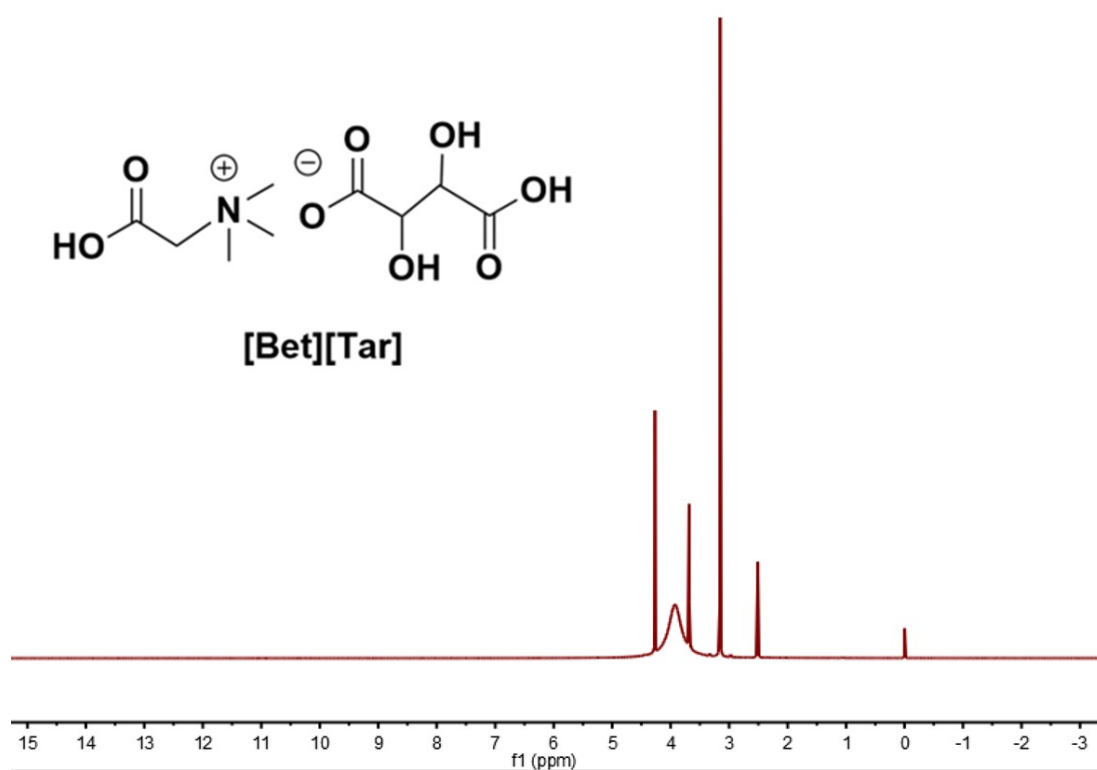

Figure S1.  $^1\text{H}$  NMR spectrum of [Bet][Tar].

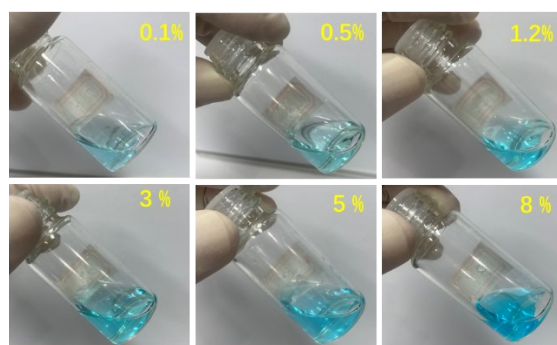

Figure S2 Physical picture of different GHK-Cu contents after 160 days of storage.

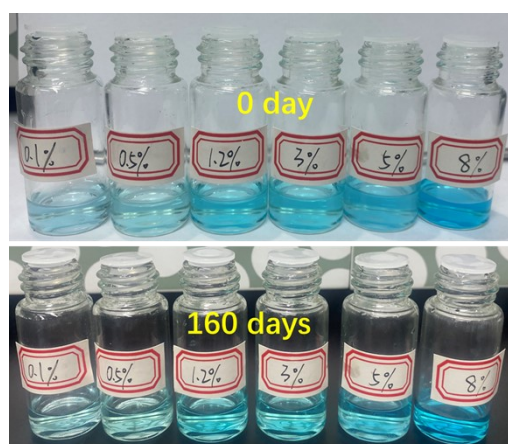

Figure S3 Comparison graph of 0 and 160 days.

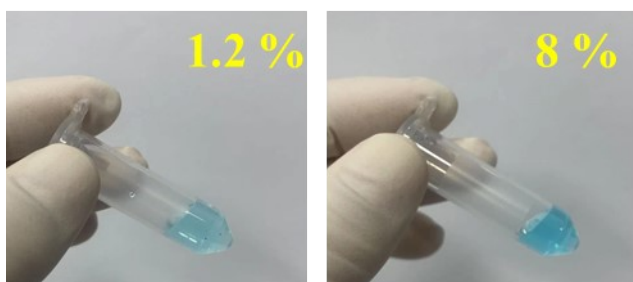

**Figure S4** Physical picture after centrifugation at 4000rpm for 15 minutes.

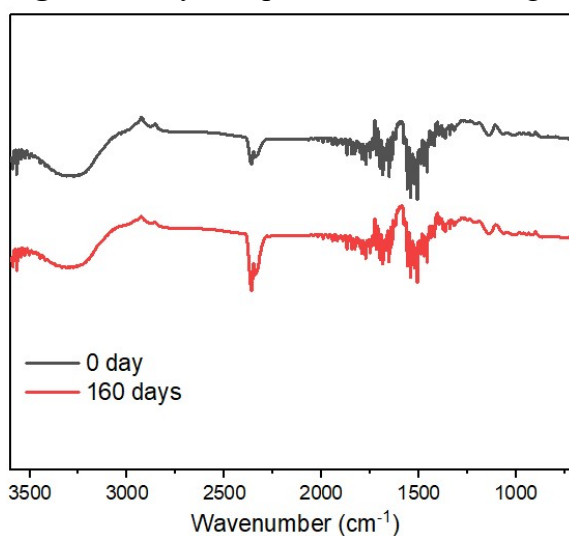

**Figure S5** FTIR comparison graph after 160 days of storage.

| Form of material                                                       | Delivery methods           | Delivery efficiency | Disadvantages                              |
|------------------------------------------------------------------------|----------------------------|---------------------|--------------------------------------------|
| ILs                                                                    | Transdermal                | High                | Not yet                                    |
| Microneedle                                                            | Transdermal                | High                | With trauma                                |
| Graft trim                                                             | Injections<br>/Transdermal | Low                 | Process complexity                         |
| Gel Coat                                                               | Transdermal                | Low                 | Process complexity<br>/Low drug loading    |
| Cosmetic formulations<br>(lyophilized powders,<br>masks, serums, etc.) | Transdermal                | Low                 | Complex composition<br>/Easily deactivated |

**Table S1** Comparison of different transdermal delivery methods of GHK-Cu.

| GHK-Cu content (%) | Size  |          | PDI   |          |
|--------------------|-------|----------|-------|----------|
|                    | 0 day | 160 days | 0     | 160 days |
| 1.2%               | 63.7  | 65.6     | 0.125 | 0.133    |

|    |      |      |       |       |
|----|------|------|-------|-------|
| 5% | 67.2 | 68.3 | 0.136 | 0.141 |
| 8% | 69.1 | 70.3 | 0.129 | 0.137 |

---

**TableS2** Comparison of particle size and PDI variation.
